# Supplementary material for: Location of Trigger Points in a Group of Police Working Dogs: A Preliminary Study
Source: MDPI journal article supplement (doi:10.3390/ani13182836), 2023-09-07
Supplement: s1 [file s1]

# Location of Trigger Points in a Group of Police Working Dogs: A Preliminary Study

Maira Rezende Formenton <sup>1,\*</sup>, Karine Portier <sup>2,3</sup>, Beatriz Ribeiro Gaspar <sup>1</sup>, Lisa Gauthier <sup>2</sup>, Lin Tchia Yeng <sup>4</sup> and Denise Tabacchi Fantoni <sup>1</sup>

<sup>1</sup> School of Veterinary Medicine and Animal Science, University of São Paulo, São Paulo 05508-270, Brazil; beatriz.gaspar@usp.br (B.R.G.); dfantoni@usp.br (D.T.F.)

<sup>2</sup> VetAgro Sup (Campus Vétérinaire), Centre de Recherche et de Formation en Algologie Comparée (CREFAC), University of Lyon, 69280 Marcy l'Etoile, France; karine.portier@vetagro-sup.fr (K.P.); lisagauthier97@gmail.com (L.G.)

<sup>3</sup> Centre National de la Recherche Scientifique (CNRS), Institut National de la Santé et de la Recherche Médicale (INSERM), Centre de Recherche en Neurosciences de Lyon (CRNL), University of Lyon, U1028 UMR 5292, Trajectoires, 69500 Bron, France

<sup>4</sup> School of Medicine, Institute of Orthopedics and Traumatology, University of São Paulo, São Paulo 05403-010, Brazil; linyeng@uol.com.br

\* Correspondence: mairaformenton@gmail.com; Tel.: +(55)-11-98567-5756

## Link for Video S1:

<https://drive.google.com/drive/folders/1KFWKqQCTAzrzdBA-jl7NUCwZY5mvLTOo?usp=sharing>

**Table S1: Dogs individual information.**

| Number | Age (Years) | Sex (F/M) | Weight (Kg) | Breed              | Work                             |
|--------|-------------|-----------|-------------|--------------------|----------------------------------|
| 1      | 7           | F         | 36          | Dutch Shepperd     | Drug Sniffing                    |
| 2      | 3           | F         | 25          | German Shepperd    | Drug Sniffing                    |
| 3      | 5           | M         | 30,1        | Mallinois Belgian  | Drug Sniffing                    |
| 4      | 5           | M         | 33,3        | Mallinois Belgian  | Drug Sniffing                    |
| 5      | 7           | M         | 31          | Mallinois Belgian  | Search And Rescue                |
| 6      | 3           | F         | 27,2        | German Shepperd    | Drug Sniffing, Search And Rescue |
| 7      | 8           | M         | 29,5        | Mallinois Belgian  | Explosive Detection              |
| 8      | 4           | M         | 34,1        | Labrador Retriever | Explosive Detection              |
| 9      | 8           | M         | 32,9        | Mallinois Belgian  | Drug Sniffing, Guarding          |
| 10     | 3           | M         | 29          | German Shepperd    | Drug Sniffing, Guarding          |
| 11     | 6           | F         | 28          | Mallinois Belgian  | Drug Sniffing, Guarding          |
| 12     | 6           | F         | 20          | Mallinois Belgian  | Drug Sniffing                    |

---

**Table S2: Dogs individual trigger point location by each evaluator.**

| DOG | TP LOCATION                 | Side  | EVALUATOR 1 | EVALUATOR 2 |
|-----|-----------------------------|-------|-------------|-------------|
| 1   | LATISSIMUS DORSI 2          | RIGHT | x           | x           |
| 1   | LONGISSIMUS LUMBORUM PART 1 | RIGHT | x           | x           |
| 1   | TRICEPS BRACHII 1           | RIGHT | x           | x           |
| 1   | QUADRICEPS FEMORIS 1        | RIGHT | x           | x           |
| 1   | BICEPS FEMORIS              | RIGHT | x           |             |
| 1   | TRAPEZIUS PARS THORACICA    | RIGHT |             | x           |
| 1   |                             |       |             |             |
| 1   | DELTOIDEUS                  | LEFT  | x           |             |
| 1   | SARTORIUS                   | LEFT  | x           |             |
| 1   | GLUTEUS MEDIUS              | LEFT  | x           |             |
| 1   | LATISSIMUS DORSI 4          | LEFT  |             | x           |
| 1   | LONGISSIMUS LUMBORUM PART 1 | LEFT  |             | x           |
| 1   | BICEPS FEMORIS              | LEFT  |             | x           |
| 1   | PECTINEUS                   | LEFT  |             | x           |
|     |                             |       |             |             |
| 2   | BICEPS FEMORIS              | RIGHT | x           | x           |
| 2   | LONGISSIMUS LUMBORUM PART 2 | RIGHT |             | x           |
| 2   |                             |       |             |             |
| 2   | BICEPS FEMORIS              | LEFT  | x           |             |
| 2   | TRAPEZIUS PARS THORACICA    | LEFT  | x           |             |
|     |                             |       |             |             |
| 3   | LATISSIMUS DORSI 2          | RIGHT | x           | x           |
| 3   | SARTORIUS                   | RIGHT | x           |             |
| 3   | QUADRICEPS FEMORIS 2        | RIGHT |             | x           |
| 3   | PECTINEUS                   | RIGHT |             | x           |
| 3   |                             |       |             |             |
| 3   | TRAPEZIUS PARS THORACICA    | LEFT  | x           |             |
| 3   | LONGISSIMUS LUMBORUM PART 2 | LEFT  |             | x           |
|     |                             |       |             |             |
| 4   | LATISSIMUS DORSI 2          | RIGHT | x           | x           |
| 4   | QUADRICEPS FEMORIS 2        | RIGHT | x           | x           |
| 4   | TRICEPS BRACHII 1           | RIGHT |             | x           |
| 4   | LONGISSIMUS LUMBORUM PART 2 | RIGHT |             | x           |
| 4   | GLUTEUS MEDIUS              | RIGHT |             | x           |
| 4   | PECTINEUS                   | RIGHT |             | x           |
| 4   |                             |       |             |             |
| 4   | LATISSIMUS DORSI 2          | LEFT  | x           |             |

---

| 4   | QUADRICEPS FEMORIS 1          | LEFT  | x           | x           |
|-----|-------------------------------|-------|-------------|-------------|
| 4   | LONGISSIMUS LUMBORUM PART 2   | LEFT  |             | x           |
| DOG | TP LOCATION                   | Side  | EVALUATOR 1 | EVALUATOR 2 |
| 5   | QUADRICEPS FEMORIS 2          | RIGHT | x           | x           |
| 5   | PECTINEUS                     | RIGHT | x           |             |
| 5   | LATISSIMUS DORSI 3            | RIGHT |             | x           |
| 5   | GLUTEUS MEDIUS                | RIGHT |             | x           |
| 5   |                               |       |             |             |
| 5   | GLUTEUS MEDIUS                | LEFT  | x           |             |
| 5   | QUADRICEPS FEMORIS 2          | LEFT  | x           |             |
| 5   | BICEPS FEMORALIS              | LEFT  | x           |             |
| 5   | LATISSIMUS DORSI 2            | LEFT  |             | x           |
| 6   | QUADRICEPS FEMORIS 2          | RIGHT | x           | x           |
| 6   | LONGISSIMUS LUMBORUM PART 1   | RIGHT |             | x           |
| 7   |                               |       |             |             |
| 7   | LATISSIMUS DORSI 3            | RIGHT | x           | x           |
| 7   | QUADRICEPS FEMORIS 1          | RIGHT | x           |             |
| 7   | GLUTEUS MEDIUS                | RIGHT |             | x           |
| 7   |                               |       |             |             |
| 7   | LATISSIMUS DORSI 2            | LEFT  | x           | x           |
| 7   | GLUTEUS MEDIUS                | LEFT  | x           |             |
| 8   |                               |       |             |             |
| 8   | DELTOIDEUS                    | RIGHT | x           |             |
| 8   | SARTORIUS                     | RIGHT | x           |             |
| 8   | LONGISSIMUS LUMBORUM PART 2   | RIGHT |             | x           |
| 8   | LONGISSIMUS THORACICAE PART 2 | RIGHT |             | x           |
| 8   | QUADRICEPS FEMORIS 1          | RIGHT |             | x           |
| 8   | PECTINEUS                     | RIGHT |             | x           |
| 8   |                               |       |             |             |
| 8   | DELTOIDEUS                    | LEFT  | x           |             |
| 8   | SARTORIUS                     | LEFT  | x           |             |
| 8   | LONGISSIMUS LUMBORUM PART 2   | LEFT  |             | x           |
| 8   | QUADRICEPS FEMORIS 1          | LEFT  |             | x           |
| 8   | PECTINEUS                     | LEFT  |             | x           |
| 9   |                               |       |             |             |
| 9   | LONGISSIMUS LUMBORUM PART 2   | RIGHT |             | x           |
| 10  |                               |       |             |             |
| 10  | LATISSIMUS DORSI 2            | RIGHT | x           | x           |
| 10  | SARTORIUS                     | RIGHT | x           |             |

| 10   | TRICEPS BRACHII 2             | RIGHT |             | x           |
|------|-------------------------------|-------|-------------|-------------|
| 10   | LONGISSIMUS LUMBORUM PART 2   | RIGHT |             | x           |
| 10   | LATISSIMUS DORSI 1            | LEFT  | x           |             |
| 19   | SARTORIUS                     | LEFT  | x           |             |
| NAME | TP LOCATION                   | Side  | EVALUATOR 1 | EVALUATOR 2 |
| 11   | LONGISSIMUS THORACICAE PART 2 | RIGHT | x           |             |
| 11   | LATISSIMUS DORSI 5            | RIGHT |             | x           |
| 11   | SARTORIUS                     | RIGHT |             | x           |
| 11   |                               |       |             |             |
| 11   | LONGISSIMUS THORACICAE PART 2 | LEFT  | x           |             |
| 11   | LATISSIMUS DORSI 4            | LEFT  |             | x           |
| 12   | LONGISSIMUS THORACICAE PART 2 | RIGHT | x           | x           |
| 12   | LONGISSIMUS THORACICAE PART 2 | LEFT  | x           |             |
